# Supplementary material
Source: PubMed Central journal article supplement (PMC10588550)
Supplement: NIHMS1936712-supplement-Supplementary.pdf [file NIHMS1936712-supplement-Supplementary.pdf]

**Supplemental Table 1. Selected Characteristics by Center**

| Mean $\pm$ SD<br>[Range]                             | Center<br>1<br>(n=29)   | Center<br>2<br>(n=43)     | Center<br>3<br>(n=19)    | Center<br>4<br>(n=113) | Center<br>5<br>(n=38) | Center<br>6<br>(n=7) | Center<br>7<br>(n=30) | Center<br>8<br>(n=14)    | Center<br>9<br>(n=48)    |
|------------------------------------------------------|-------------------------|---------------------------|--------------------------|------------------------|-----------------------|----------------------|-----------------------|--------------------------|--------------------------|
| <b>Daycare Attendance</b> (%)<br>(yes)               | 27.6%                   | 34.9%                     | 21.1%                    | 11.5%                  | 34.2%                 | 14.3%                | 3.3%                  | 7.1%                     | 16.7%                    |
| <b>Age at Recruitment</b> (years)                    | 1.8 $\pm$ 0.6           | 1.0 $\pm$ 0.7             | 1.3 $\pm$ 0.8            | 1.0 $\pm$ 0.7          | 0.5 $\pm$ 0.3         | 0.8 $\pm$ 0.7        | 0.3 $\pm$ 0.3         | 1.1 $\pm$ 0.7            | 0.7 $\pm$ 0.5            |
| <b>Number of visits per subject</b>                  | 1.1 $\pm$ 0.3           | 1.2 $\pm$ 0.5             | 1.0 $\pm$ 0.0            | 1.3 $\pm$ 0.7          | 3.1 $\pm$ 1.4         | 4.6 $\pm$ 1.8        | 5.4 $\pm$ 3.5         | 1.1 $\pm$ 0.3            | 2.8 $\pm$ 1.6            |
| <b>Sex</b> (% female)                                | 48.3%                   | 46.5%                     | 36.8%                    | 46.9%                  | 21.6%<br>(n=37)       | 28.6%                | 51.7%<br>(n=29)       | 61.5%<br>(n=13)          | 42.6%<br>(n=47)          |
| <b>Race</b> (% non-white)                            | 44.8%                   | 32.6%                     | 52.6%                    | 55.8%                  | 42.1%                 | 57.1%                | 33.3%                 | 42.9%                    | 37.5%                    |
| <b>Ethnicity</b> (% Hispanic)                        | 7.1%<br>(n=28)          | 14.0%                     | 31.6%                    | 5.3%                   | 15.8%                 | 42.9%                | 23.3%                 | 7.7%<br>(n=13)           | 8.9%<br>(n=45)           |
| <b>Gestational age</b> (weeks)                       | 27.0 $\pm$ 2.3          | 27.3 $\pm$ 2.2            | 26.6 $\pm$ 2.7<br>(n=15) | 27.0 $\pm$ 2.7         | 26.4 $\pm$ 2.5        | 25.8 $\pm$ 1.8       | 26.9 $\pm$ 1.9        | 27.1 $\pm$ 3.3<br>(n=13) | 26.1 $\pm$ 2.3<br>(n=47) |
| <b>Birth weight</b> (grams)                          | 914 $\pm$ 357<br>(n=27) | 977 $\pm$ 362             | 717 $\pm$ 277<br>(n=15)  | 945 $\pm$ 368          | 942 $\pm$ 401         | 763 $\pm$ 153        | 870 $\pm$ 317         | 873 $\pm$ 406<br>(n=13)  | 824 $\pm$ 313<br>(n=47)  |
| <b>Length of initial admission</b> (months)          | 8.6 $\pm$ 3.6<br>(n=26) | 3.6 $\pm$ 1.0<br>(n = 42) | 8.3 $\pm$ 2.9<br>(n=15)  | 4.5 $\pm$ 2.2          | 5.6 $\pm$ 3.6         | 6.3 $\pm$ 5.0        | 3.3 $\pm$ 0.7         | 3.7 $\pm$ 1.0<br>(n=13)  | 4.0 $\pm$ 1.9<br>(n=45)  |
| <b>Severe BPD</b> (%)<br>(yes)                       | 78.6%<br>(n=28)         | 46.5%                     | 100%<br>(n=18)           | 69.9%                  | 100%                  | 71.4%                | 100%                  | 69.2%<br>(n=13)          | 36.2%<br>(n=47)          |
| <b>Pulmonary hypertension after 36 weeks</b> (% yes) | 44.4%<br>(n=27)         | 7.0%                      | 53.3%<br>(n=15)          | 15.2%<br>(n=112)       | 23.7%                 | 57.1%                | 6.7%                  | 15.4%<br>(n=13)          | 32.6%<br>(n=46)          |
| <b>Tracheostomy</b> (% yes)                          | 69.0%                   | 0.0%                      | 47.4%                    | 8.0%                   | 18.4%                 | 28.6%                | 0.0%                  | 0.0%                     | 6.3%                     |
| <b>Home ventilator</b> (% yes)                       | 48.3%                   | 0.0%                      | 31.6%                    | 7.1%                   | 18.4%                 | 14.3%                | 0.0%                  | 0.0%                     | 4.2%                     |
| <b>Feeding tube</b> (%)<br>(yes)                     | 77.8%<br>(n=27)         | 21.0%                     | 94.1%<br>(n=17)          | 33.6%                  | 44.7%                 | 42.9%                | 10.0%                 | 21.4%                    | 39.6%                    |
| <b>Medicaid</b> (%)<br>(yes)                         | 88.5%<br>(n=26)         | 16.3%                     | 68.8%<br>(n=16)          | 40.7%                  | 63.2%                 | 28.6%                | 77.3%                 | 28.6%                    | 71.7%<br>(n=46)          |

**Supplemental Table 2. Clinical Outcomes with Daycare Attendance**

|                                            | OR ± SE<br>[95% C.I.]              | Adjusted odds ratio<br>with attending<br>daycare with no<br>respiratory support* | P value      | Adjusted odds ratio<br>with attending<br>daycare with<br>respiratory support* | P value          |
|--------------------------------------------|------------------------------------|----------------------------------------------------------------------------------|--------------|-------------------------------------------------------------------------------|------------------|
| <b>Acute care</b>                          | <b>Sick visits</b>                 | 1.44 ± 0.58<br>[0.66, 3.17]<br>(n=204 with 324 visits)                           | 0.36         | 1.07 ± 0.60<br>[0.36, 3.18]<br>(n=170 with 357 visits)                        | 0.90             |
|                                            | <b>Emergency department visits</b> | 2.10 ± 0.84<br>[0.96, 4.60]<br>(n=204 with 323 visits)                           | 0.06         | 2.81 ± 1.17<br>[1.25, 6.37]<br>(n=167 with 355 visits)                        | <b>0.013</b>     |
|                                            | <b>Hospital readmissions</b>       | 1.79 ± 1.22<br>[0.47, 6.79]<br>(n=204 with 323 visits)                           | 0.39         | 2.00 ± 0.89<br>[0.84, 4.78]<br>(n=167 with 355 visits)                        | 0.12             |
|                                            | <b>Antibiotics</b>                 | 2.09 ± 0.82<br>[0.97, 4.52]<br>(n=203 with 323 visits)                           | 0.06         | 1.20 ± 0.56<br>[0.48, 3.01]<br>(n=165 with 349 visits)                        | 0.70             |
|                                            | <b>Systemic steroids</b>           | 2.88 ± 1.24<br>[1.25, 6.68]<br>(n=203 with 322 visits)                           | <b>0.013</b> | 3.64 ± 2.26<br>[1.08, 12.27]<br>(n=164 with 349 visits)                       | <b>0.037</b>     |
| <b>Chronic symptoms and medication use</b> | <b>Trouble breathing</b>           | 1.50 ± 0.54<br>[0.74, 3.04]<br>(n=200 with 314 visits)                           | 0.27         | 1.78 ± 0.72<br>[0.80, 3.94]<br>(n=169 with 349 visits)                        | 0.16             |
|                                            | <b>Nighttime symptoms</b>          | 1.00 ± 0.50<br>[0.38, 2.66]<br>(n=199 with 313 visits)                           | 1.00         | 3.26 ± 1.45<br>[1.36, 7.82]<br>(n=170 with 350 visits)                        | <b>0.008</b>     |
|                                            | <b>Activity limitations</b>        | 2.41 ± 0.99<br>[1.08, 5.41]<br>(n=197 with 310 visits)                           | <b>0.033</b> | 6.57 ± 3.16<br>[2.56, 16.86]<br>(n=167 with 346 visits)                       | <b>&lt;0.001</b> |
|                                            | <b>Rescue medication use</b>       | 2.53 ± 0.95<br>[1.22, 5.27]<br>(n=197 with 311 visits)                           | <b>0.013</b> | 1.84 ± 0.82<br>[0.77, 4.39]<br>(n=170 with 349 visits)                        | 0.17             |

\*Odds ratios were generated through logistic regression models with clinic visits (prior to 3 years of age) clustered by subject. Outcomes were coded as no=0 and yes=1. Regressions were adjusted for age at the time of clinic visit, age at initial hospital discharge, presence of pulmonary hypertension on or after 36 weeks corrected age, and any feeding tube at the time of clinic visit (i.e., nasogastric, gastrostomy, jejunostomy, or gastrojejunostomy tubes). Regressions were stratified by any respiratory support at the time of clinic visit (i.e., supplemental oxygen, tracheostomy, home ventilator, and/or CPAP/BiPAP). N refers to the number of subjects and their total number of clinic visits in aggregate for each outcome.
